# Supplementary material for: Metabolite Profiling of Helichrysum italicum Derived Food Supplements by 1H-NMR-Based Metabolomics
Source: MDPI journal article supplement (doi:10.3390/molecules26216619), 2021-10-31
Supplement: s1 [file s1]

## Supporting information

# Metabolite Profiling of *Helichrysum italicum* Derived Food Supplements by $^1\text{H}$ -NMR-Based Metabolomics

Antonietta Cerulli, Milena Masullo, and Sonia Piacente\*

Dipartimento di Farmacia, Università degli Studi di Salerno, Via Giovanni Paolo II n. 132, 84084 Fisciano, SA, Italy; [piacente@unisa.it](mailto:piacente@unisa.it)

\* Correspondence: [piacente@unisa.it](mailto:piacente@unisa.it); Tel.: +39-089-969763

**Figure S1.**  $^1\text{H}$  NMR Spectrum (600 MHz,  $\text{CD}_3\text{OD}$ ) of **A**

**Figure S2.**  $^1\text{H}$  NMR Spectrum (600 MHz,  $\text{CD}_3\text{OD}$ ) of **B**

**Figure S3.**  $^1\text{H}$  NMR Spectrum (600 MHz,  $\text{CD}_3\text{OD}$ ) of **C**

**Figure S4.** HSQC Spectrum ( $\text{CD}_3\text{OD}$ ) of **C**

**Figure S5.** HMBC Spectrum ( $\text{CD}_3\text{OD}$ ) of **C**

**Figure S6.** COSY Spectrum ( $\text{CD}_3\text{OD}$ ) of **C**

**Figure S7.**  $^1\text{H}$  NMR Spectrum (600 MHz,  $\text{CD}_3\text{OD}$ ) of **D**

**Figure S8.** HSQC Spectrum ( $\text{CD}_3\text{OD}$ ) of **D**

**Figure S9.** HMBC Spectrum ( $\text{CD}_3\text{OD}$ ) of **D**

**Figure S10.** COSY Spectrum ( $\text{CD}_3\text{OD}$ ) of **D**

**Figure S11.**  $^1\text{H}$  NMR Spectrum (600 MHz,  $\text{CD}_3\text{OD}$ ) of **E**

**Figure S12.**  $^1\text{H}$  NMR Spectrum (600 MHz,  $\text{CD}_3\text{OD}$ ) of **F**

**Figure S13.** HSQC Spectrum ( $\text{CD}_3\text{OD}$ ) of **F**

**Figure S14.** HSQC Spectrum (CD<sub>3</sub>OD) of **F** region 4.5-8.5 ppm

**Figure S15.** HMBC Spectrum (CD<sub>3</sub>OD) of **F**

**Figure S16.** COSY Spectrum (CD<sub>3</sub>OD) of **F**

**Figure S17.** <sup>1</sup>H NMR Spectrum (600 MHz, CD<sub>3</sub>OD) of **G**

**Figure S18.** <sup>1</sup>H NMR Spectrum (600 MHz, CD<sub>3</sub>OD) of **H**

**Figure S19.** Principal Component Analysis of *H. italicum* derived food supplements obtained by targeted analysis. A) PCA single variables to the principal component 1 (PC1), B) PCA single variables to the principal component 2 (PC2)

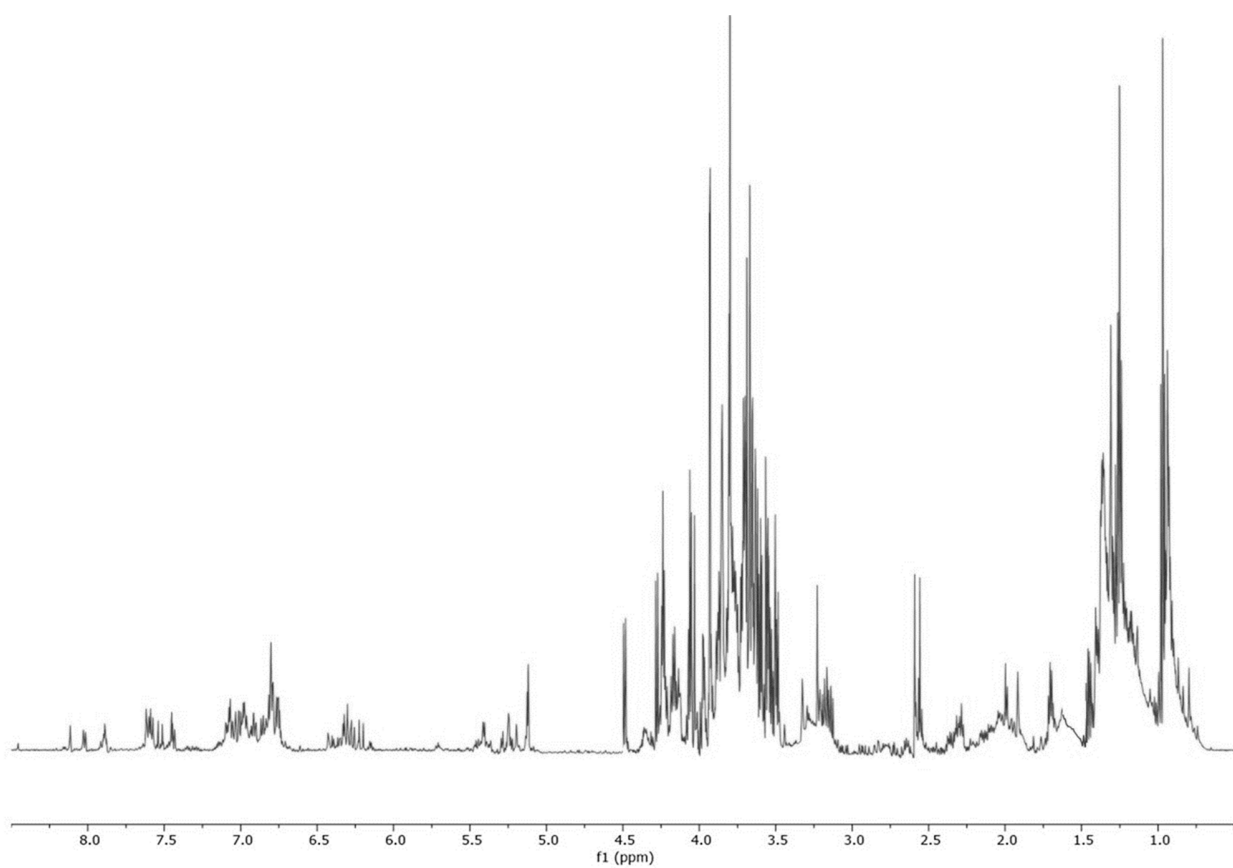

**Figure S1.**  $^1\text{H}$  NMR Spectrum (600 MHz,  $\text{CD}_3\text{OD}$ ) of **A**

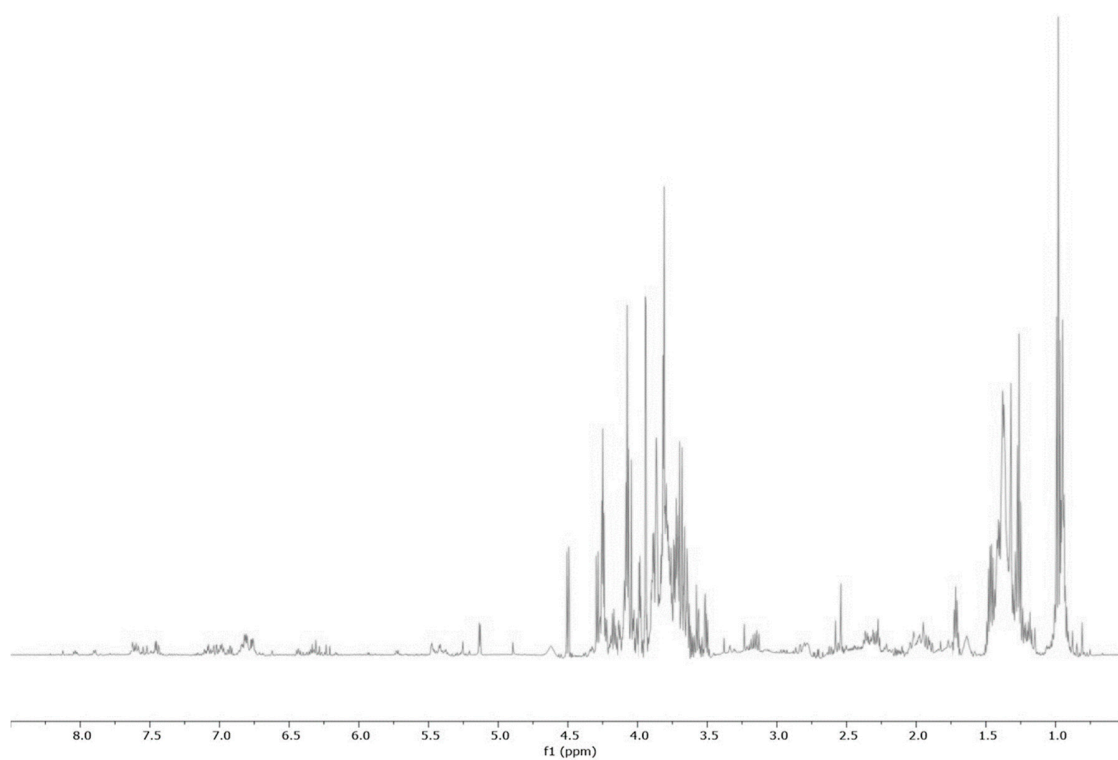

**Figure S2.**  $^1\text{H}$  NMR Spectrum (600 MHz,  $\text{CD}_3\text{OD}$ ) of **B**

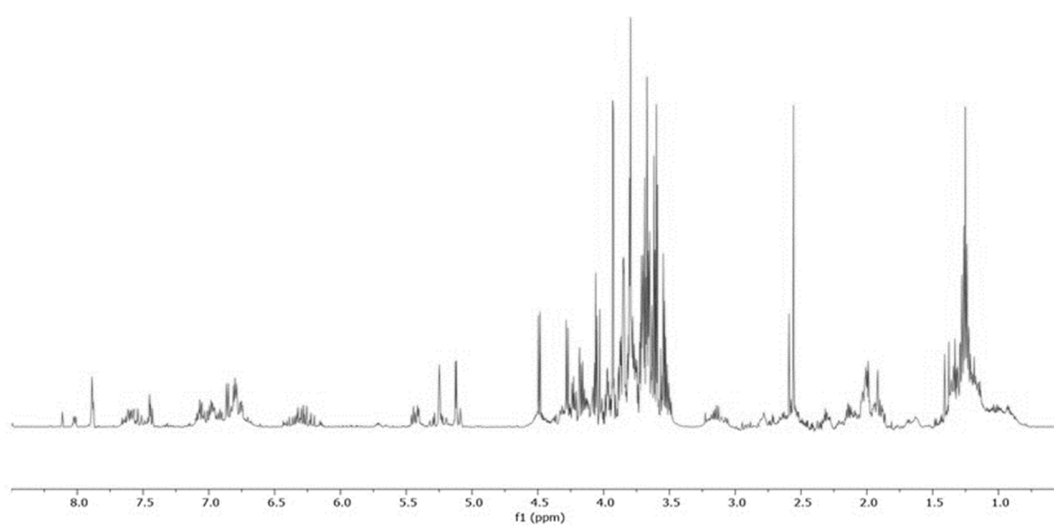

**Figure S3.**  $^1\text{H}$  NMR Spectrum (600 MHz,  $\text{CD}_3\text{OD}$ ) of **C**

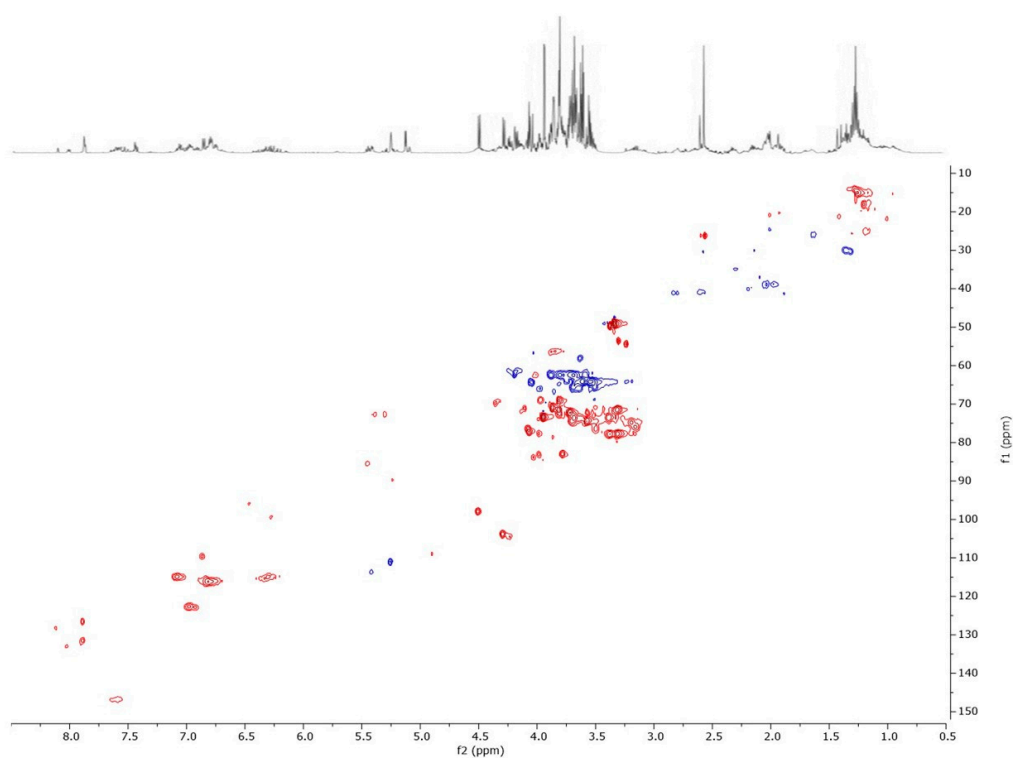

**Figure S4.** HSQC Spectrum (CD<sub>3</sub>OD) of C

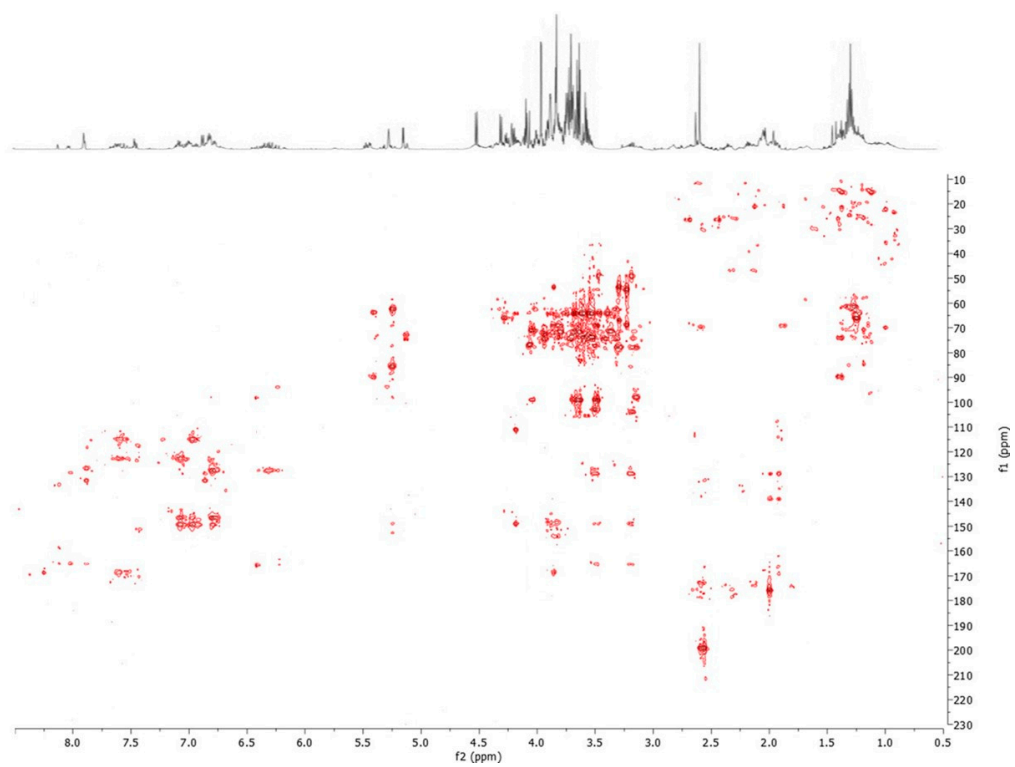

**Figure S5.** HMBC Spectrum (CD<sub>3</sub>OD) of C

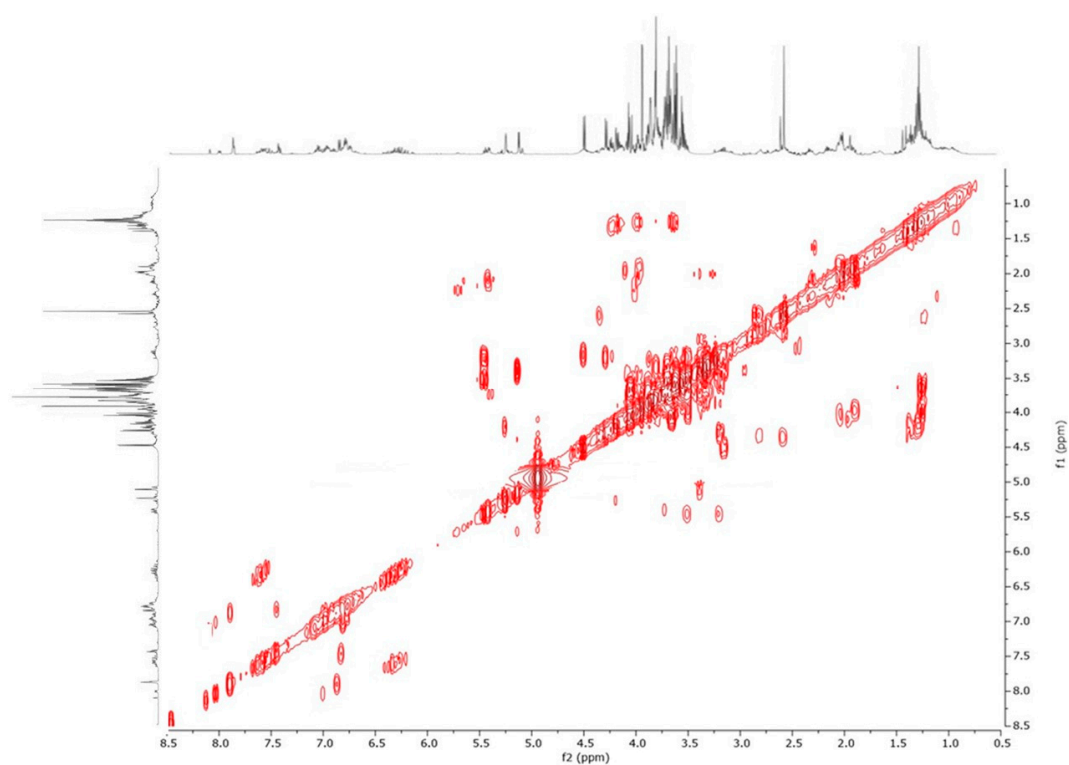

**Figure S6.** COSY Spectrum (CD<sub>3</sub>OD) of C

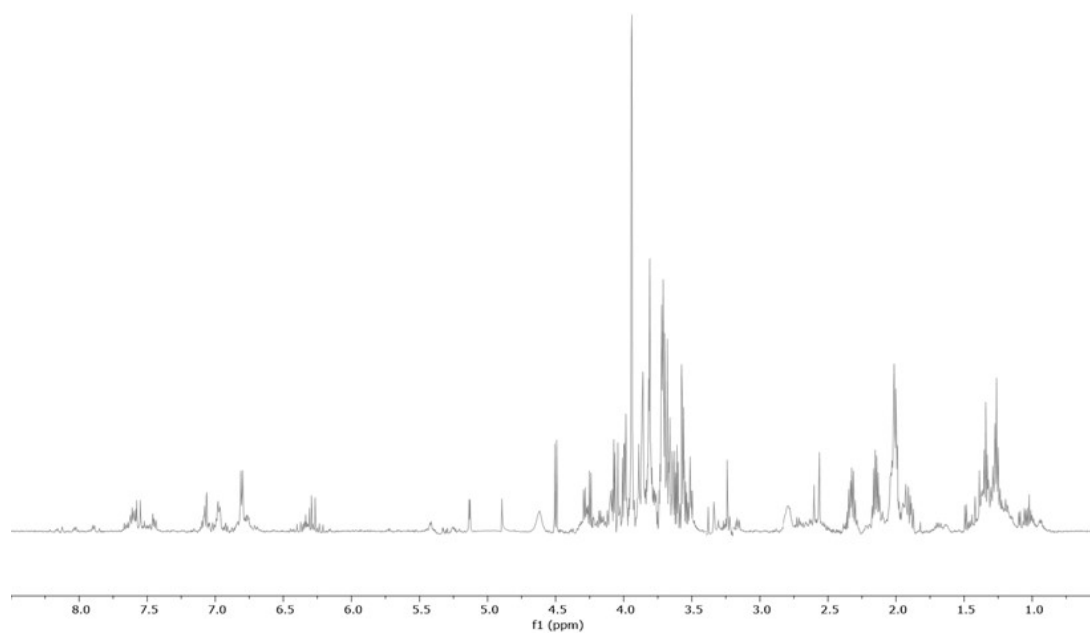

**Figure S7.** <sup>1</sup>H NMR Spectrum (600 MHz, CD<sub>3</sub>OD) of D

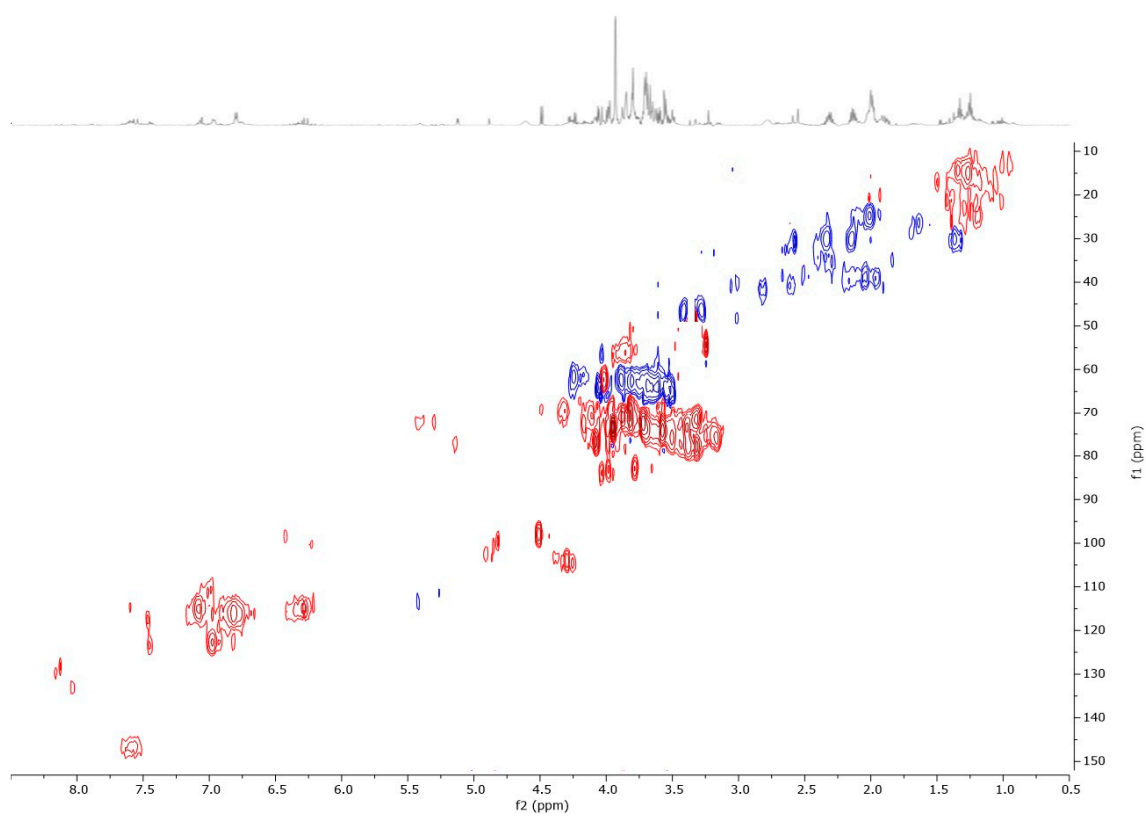

**Figure S8.** HSQC Spectrum (CD<sub>3</sub>OD) of **D**

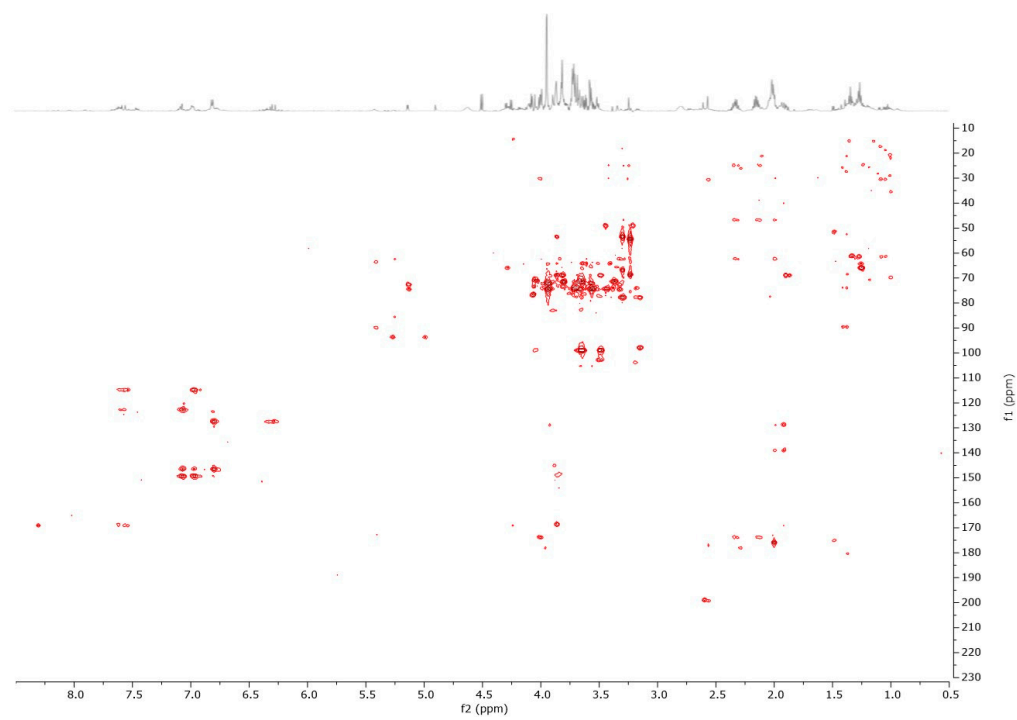

**Figure S9.** HMBC Spectrum (CD<sub>3</sub>OD) of **D**

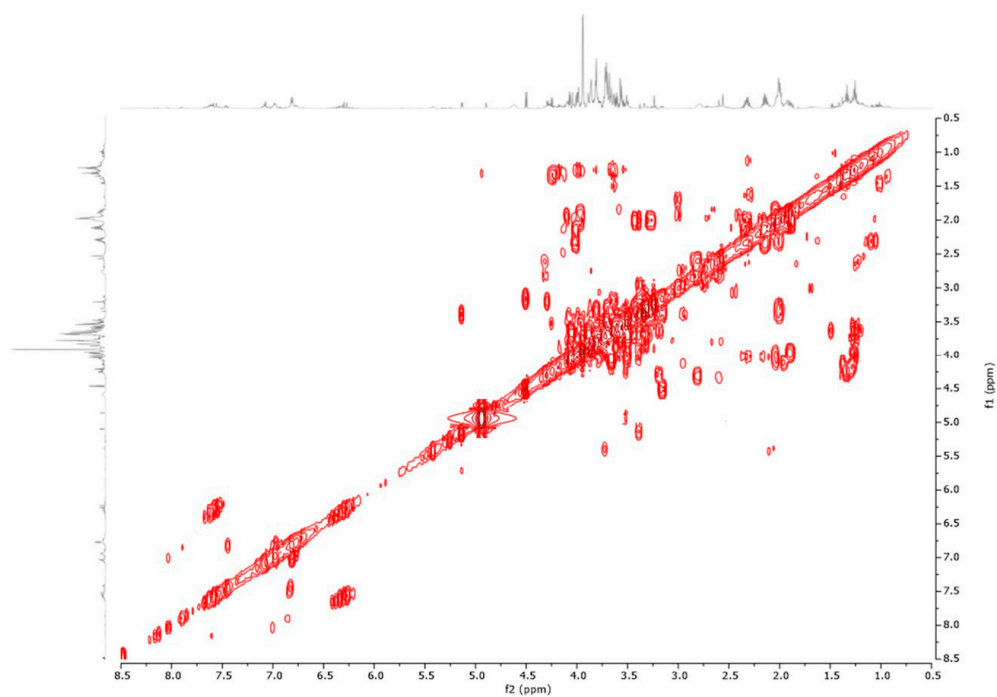

**Figure S10.** COSY Spectrum (CD<sub>3</sub>OD) of **D**

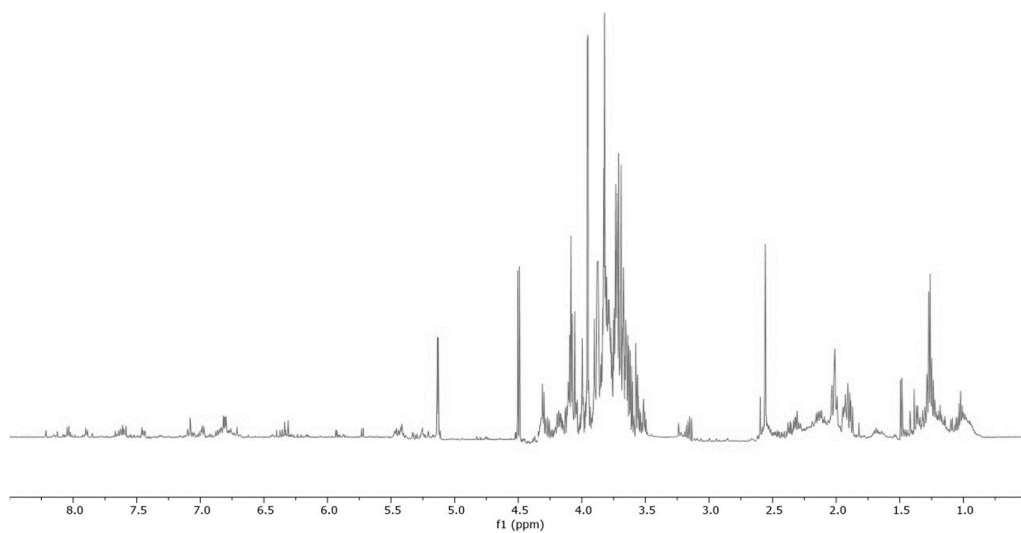

**Figure S11.** <sup>1</sup>H NMR Spectrum (600 MHz, CD<sub>3</sub>OD) of **E**



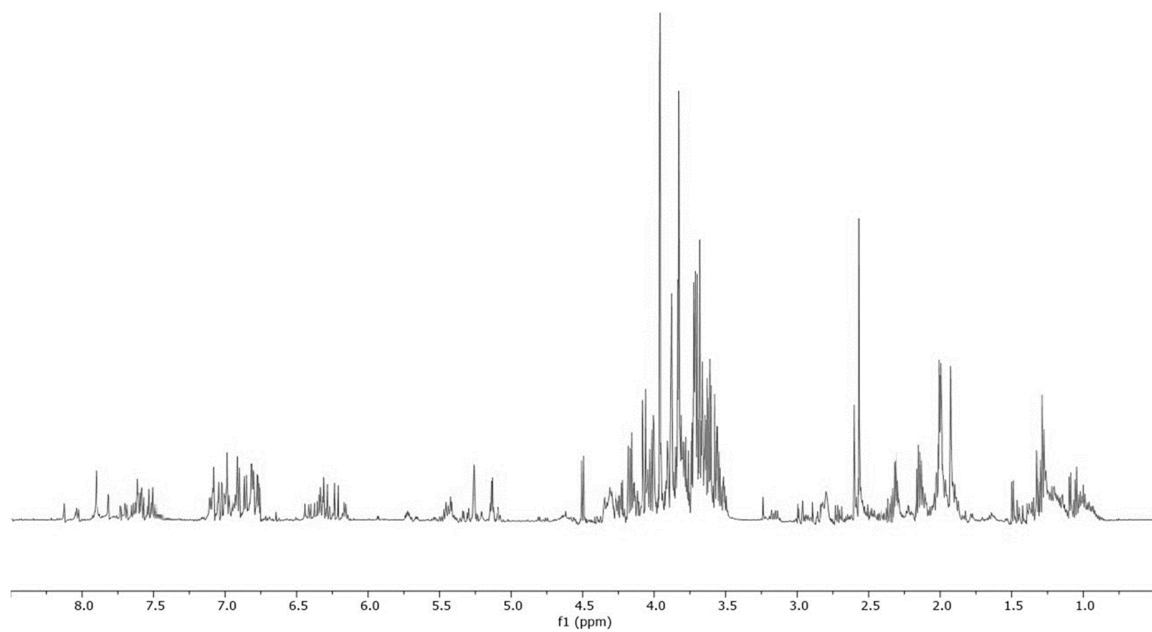

**Figure S12.**  $^1\text{H}$  NMR Spectrum (600 MHz,  $\text{CD}_3\text{OD}$ ) of **F**

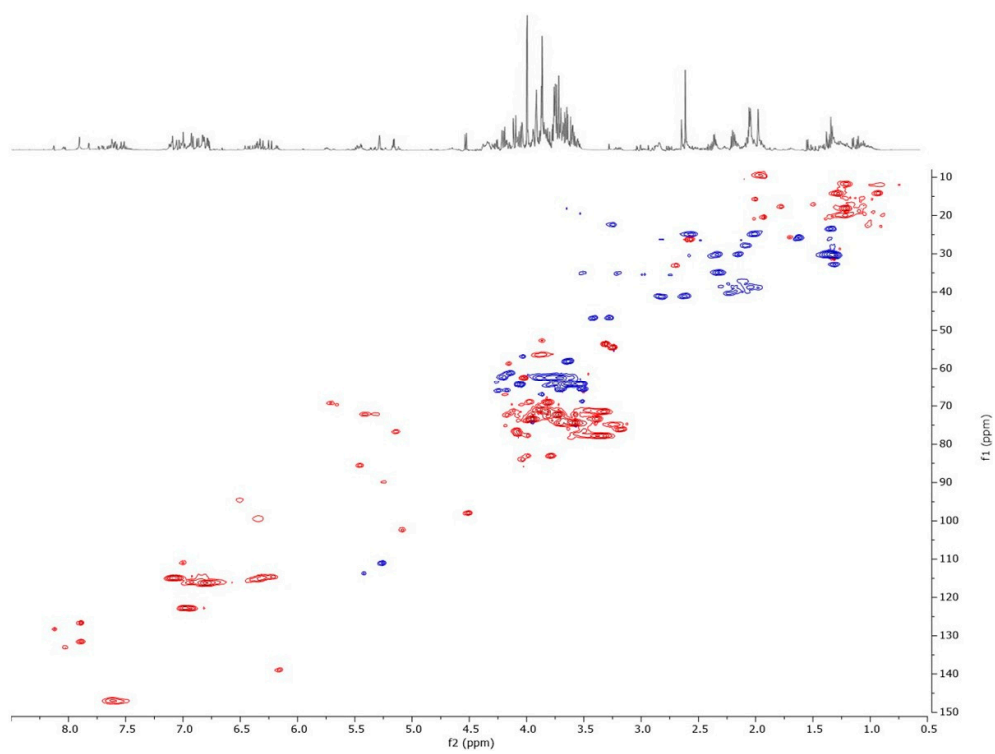

**Figure S13.** HSQC Spectrum ( $\text{CD}_3\text{OD}$ ) of **F**

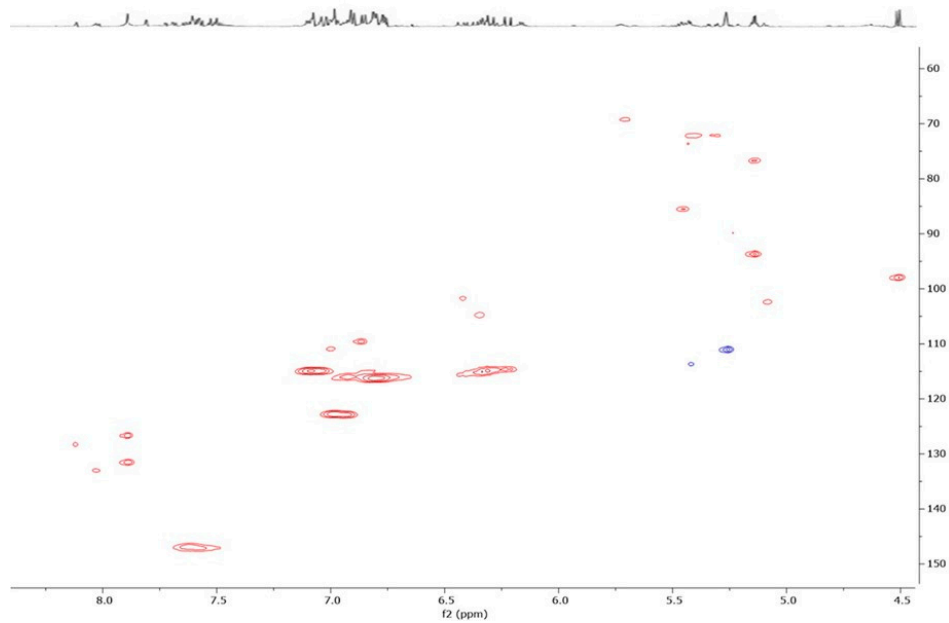

**Figure S14.** HSQC Spectrum ( $\text{CD}_3\text{OD}$ ) of **F** region 4.5-8.5 ppm

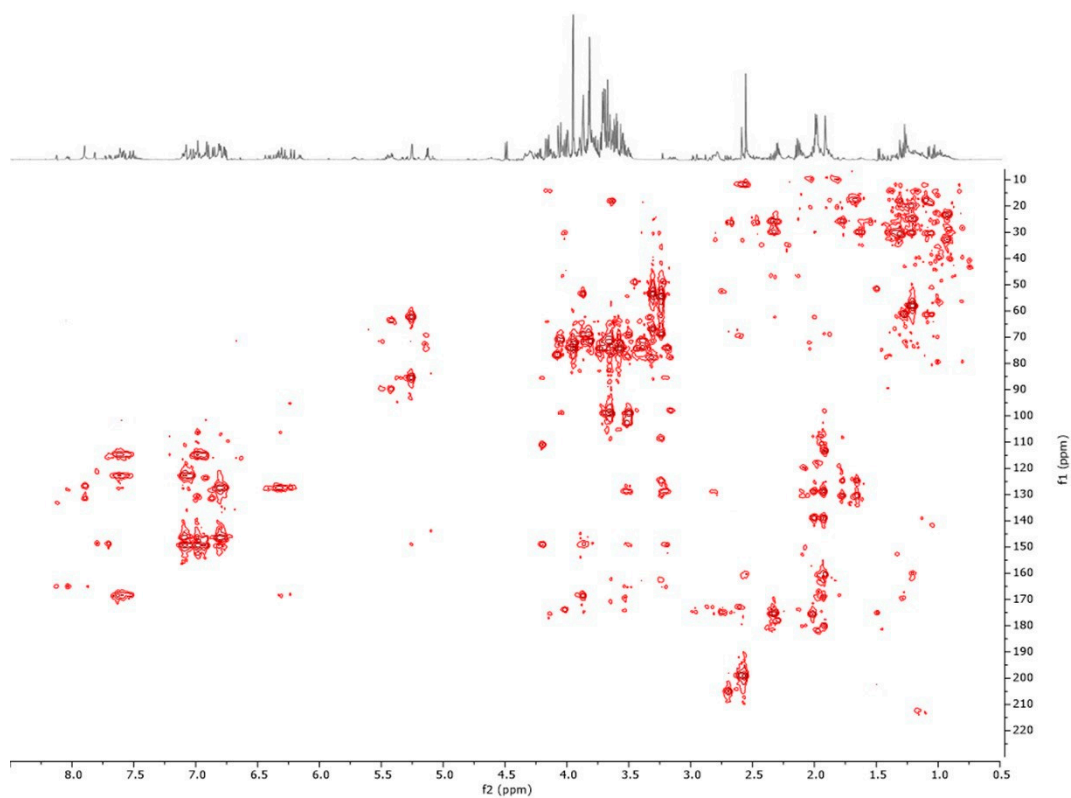

**Figure S15.** HMBC Spectrum ( $\text{CD}_3\text{OD}$ ) of **F**

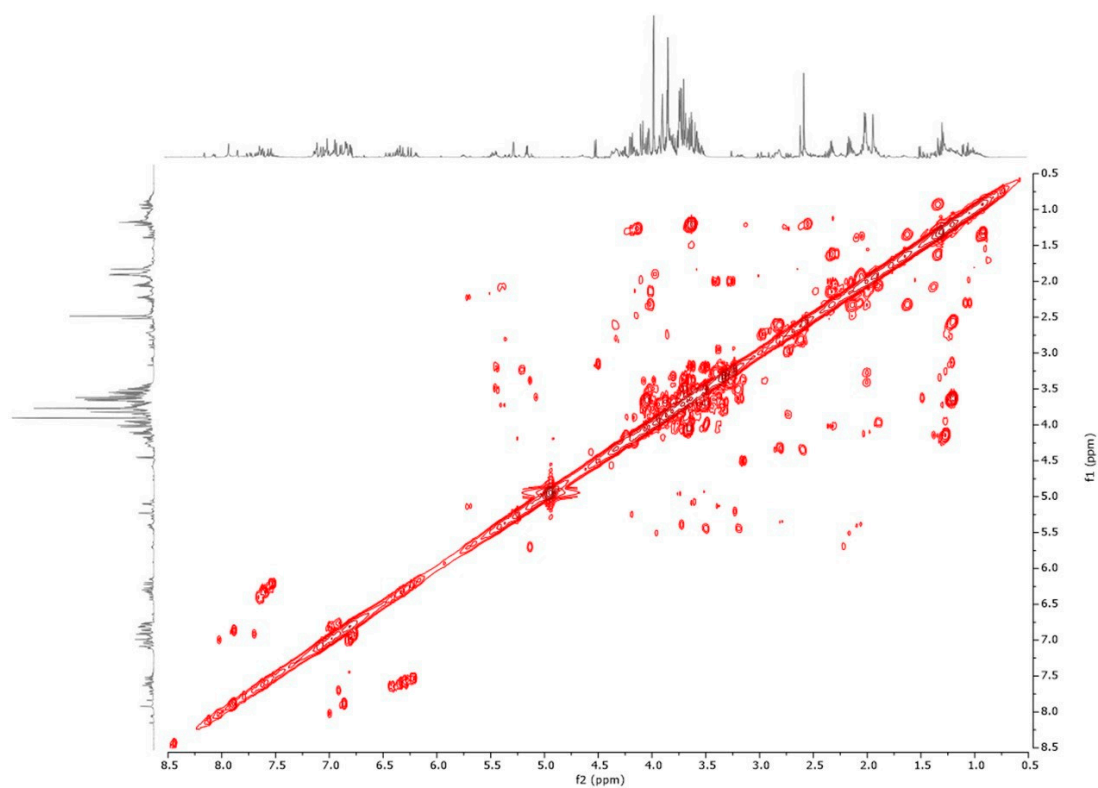

**Figure S16.** COSY Spectrum ( $\text{CD}_3\text{OD}$ ) of **F**

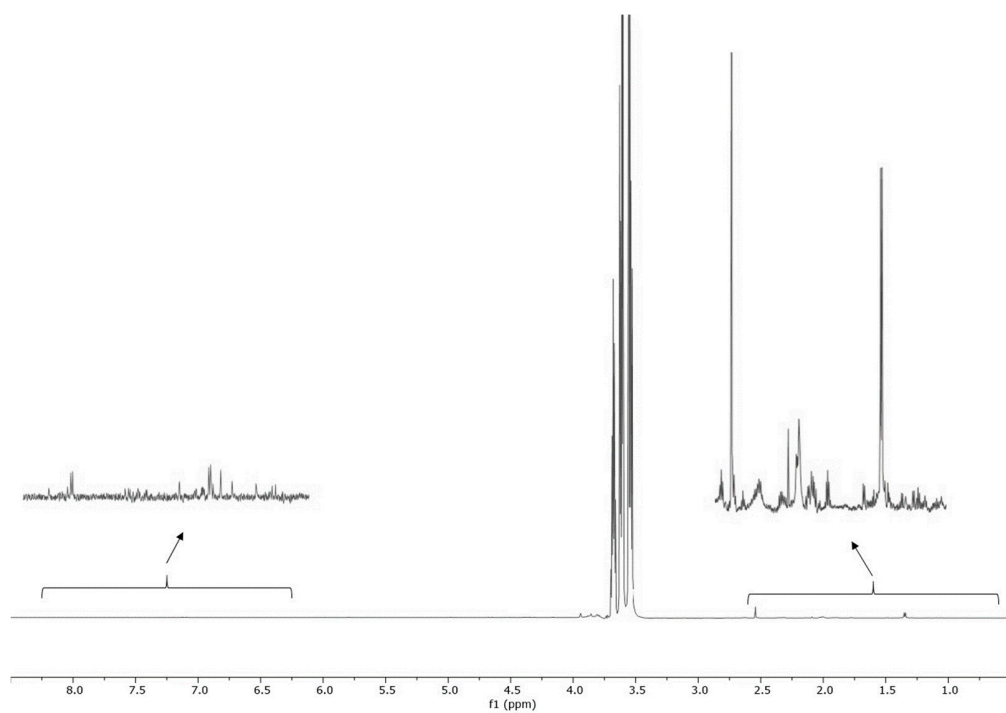

**Figure S17.**  $^1\text{H}$  NMR Spectrum (600 MHz,  $\text{CD}_3\text{OD}$ ) of **G**

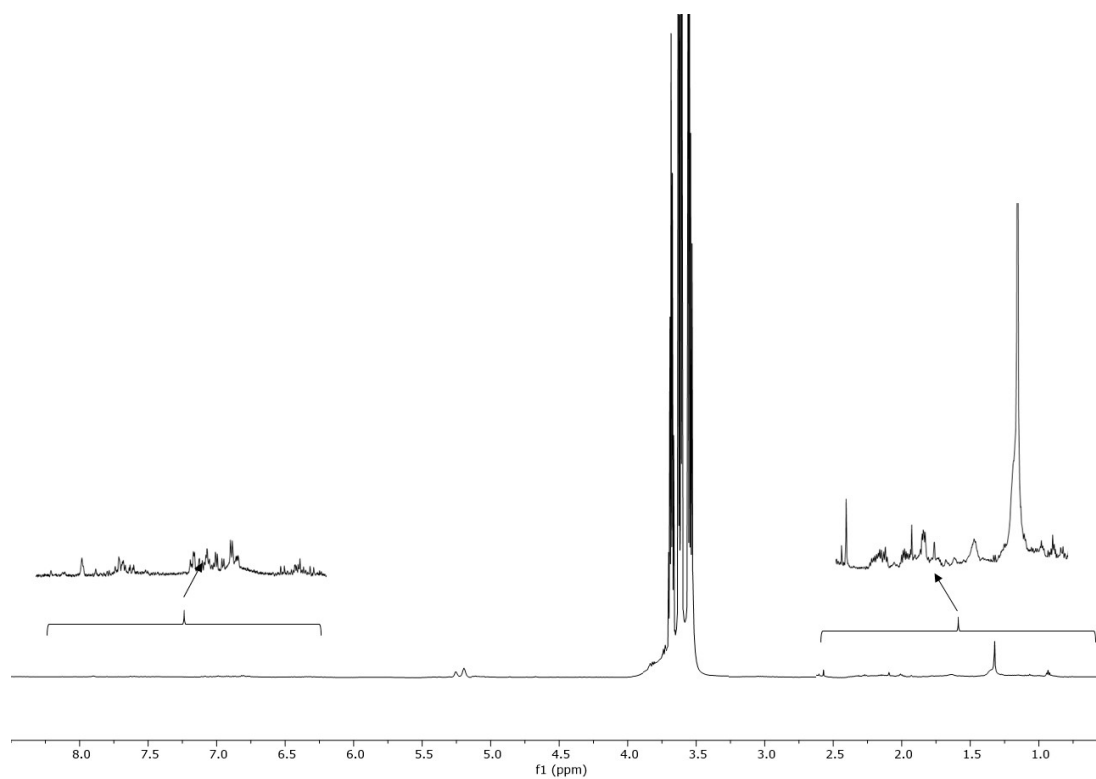

**Figure S18.**  $^1\text{H}$  NMR Spectrum (600 MHz,  $\text{CD}_3\text{OD}$ ) of **H**

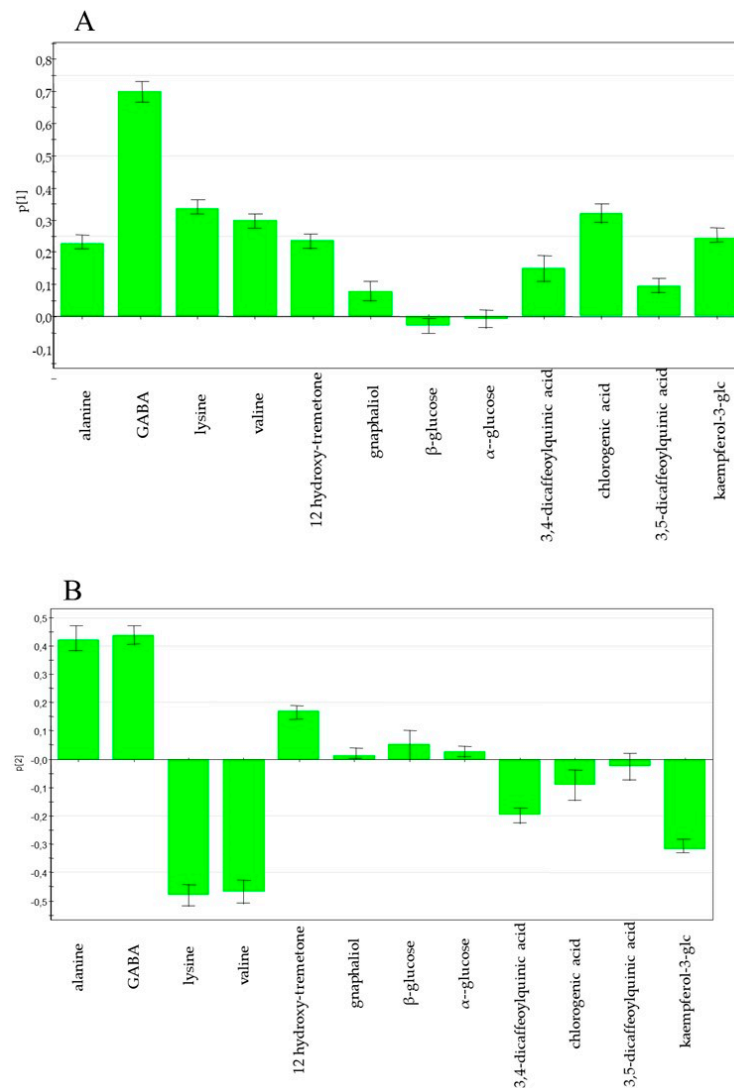

**Figure S19.** Principal Component Analysis of *H. italicum* derived food supplements obtained by targeted analysis. A) PCA single variables to the principal component 1 (PC1), B) PCA single variables to the principal component 2 (PC2)
